# Supplementary material for: &nbsp;Genome-Wide Analysis of R2R3-MYB Transcription Factors Family in The Autopolyploid Saccharum Spontaneum: An Exploration of Dominance Expression and Stress Response&nbsp;
Source: Research Square preprint supplement (doi:10.21203/rs.3.rs-199103/v1), 2021-02-16
Supplement: Supplementary file 1 [file 0596907feae6c90c61b463de.xlsx]

## Sheet: R2R3-MYB genes classification
Subgroup	SsMYB gene ID	OsMYB gene ID
G1	Sspon.04G0011570-1A	LOC_Os02g54520
	Sspon.04G0011570-1P	LOC_Os08g15020
	Sspon.06G0008220-1A	LOC_Os09g26170
	Sspon.01G0028930-1P	LOC_Os01g09590
	Sspon.01G0028930-1A	LOC_Os01g52410
	Sspon.05G0013770-1A	LOC_Os01g49160
	Sspon.02G0018400-1A	LOC_Os10g35660
	Sspon.02G0014200-1A
	Sspon.02G0014200-1P
	Sspon.03G0022850-1P
	Sspon.03G0022850-3C
	Sspon.03G0031360-1B
	Sspon.03G0009150-1P
	Sspon.03G0009150-2P
	Sspon.03G0009150-1A
	Sspon.03G0031760-1B
	Sspon.02G0032360-1T
	Sspon.02G0032360-1A
	Sspon.01G0020710-1A
	Sspon.01G0038770-1P
	Sspon.01G0038770-2C
	Sspon.05G0009350-1A
	Sspon.05G0009350-1P
G2	Sspon.05G0020540-1A	LOC_Os12g03150
	Sspon.05G0020540-3P	LOC_Os11g03440
	Sspon.07G0017530-3C	LOC_Os11g35390
	Sspon.06G0015630-1A	LOC_Os03g26130
	Sspon.05G0020540-4P	LOC_Os09g24800
	Sspon.05G0020540-1P	LOC_Os08g33940
	Sspon.05G0020540-5P	LOC_Os07g43580
	Sspon.02G0014700-2P
	Sspon.02G0014700-5P
	Sspon.01G0010890-1A
	Sspon.02G0033720-1P
	Sspon.02G0014700-1P
	Sspon.02G0014700-3P
	Sspon.02G0014700-4P
	Sspon.01G0010890-1P
	Sspon.02G0033720-1B
	Sspon.02G0014700-3C
G3	Sspon.04G0000680-2P	LOC_Os04g45060
	Sspon.05G0024340-1B	LOC_Os02g42870
	Sspon.04G0000680-1P	LOC_Os04g50680
	Sspon.04G0000680-3D	LOC_Os06g02250
	Sspon.03G0035340-1B	LOC_Os03g27090
	Sspon.08G0024260-1B	LOC_Os07g37210
	Sspon.08G0024260-1P	LOC_Os08g37970
	Sspon.02G0000080-2B	LOC_Os06g11780
	Sspon.06G0019220-1P	LOC_Os02g51799
	Sspon.06G0019220-1B	LOC_Os08g33660
	Sspon.04G0009700-1A
	Sspon.06G0005920-1T
	Sspon.06G0005920-4D
	Sspon.04G0009700-1P
	Sspon.04G0009700-2P
	Sspon.04G0009700-3P
G4	Sspon.06G0023990-1B	LOC_Os08g05520
	Sspon.04G0000650-2P	LOC_Os02g02370
	Sspon.04G0000650-3P	LOC_Os01g07450
	Sspon.04G0000650-1P	LOC_Os12g33070
	Sspon.04G0000650-4P	LOC_Os01g51260
	Sspon.04G0000650-2B	LOC_Os07g31470
	Sspon.04G0021290-1A	LOC_Os01g50720
	Sspon.03G0021720-1P	LOC_Os05g46610
	Sspon.03G0021720-2B	LOC_Os01g36460
	Sspon.05G0036390-1C	LOC_Os03g25550
	Sspon.03G0036190-1B	LOC_Os05g04820
	Sspon.02G0027790-1A	LOC_Os01g18240
	Sspon.03G0007910-1A
	Sspon.03G0008110-1A
	Sspon.07G0002970-1A
	Sspon.03G0013570-1A
	Sspon.03G0013570-1T
	Sspon.01G0010650-1A
	Sspon.01G0039760-1B
	Sspon.01G0010650-1P
	Sspon.01G0039760-1P
	Sspon.07G0013680-1A
	Sspon.03G0016200-2T
	Sspon.03G0016200-1A
	Sspon.03G0016200-1T
	Sspon.03G0016200-3T
G5	Sspon.05G0013100-3P	LOC_Os02g41510
	Sspon.05G0013100-2P	LOC_Os04g43680
	Sspon.05G0013100-2B	LOC_Os10g33810
	Sspon.01G0019490-1A	LOC_Os02g46780
	Sspon.01G0019490-1P	LOC_Os04g50770
	Sspon.05G0004230-1A	LOC_Os08g43550
	Sspon.05G0023530-1B	LOC_Os01g65370
	Sspon.06G0003930-1A	LOC_Os05g35500
	Sspon.03G0005140-1A	LOC_Os12g07640
	Sspon.03G0005140-1P	LOC_Os09g36730
	Sspon.06G0003930-1P
	Sspon.05G0018090-3D
	Sspon.07G0019440-1A
	Sspon.07G0019440-3P
	Sspon.07G0019440-1T
	Sspon.07G0019440-4P
	Sspon.07G0019440-1P
	Sspon.07G0019440-2P
G6	Sspon.03G0015440-1P	LOC_Os01g19970
	Sspon.03G0015440-3C	LOC_Os01g50110
	Sspon.01G0009150-1A
	Sspon.01G0038470-2C
	Sspon.01G0008110-3D
	Sspon.03G0008020-1A
	Sspon.01G0012110-2C
	Sspon.08G0012170-1A
	Sspon.08G0012170-1P
	Sspon.08G0012170-2P
	G7
	Sspon.02G0015010-2P
	Sspon.02G0015010-3P
	Sspon.04G0022610-1P
	Sspon.04G0022610-2P
	Sspon.04G0004230-1A
	Sspon.04G0022610-1B
	Sspon.02G0015010-1A
	Sspon.02G0038080-1B
	Sspon.02G0015010-1P
	Sspon.02G0015020-1A
	Sspon.02G0015020-1P
G8	Sspon.06G0027690-1T	LOC_Os11g47460
	Sspon.06G0027690-2D	LOC_Os03g04900
	Sspon.06G0018820-1A	LOC_Os02g40530
	Sspon.02G0044620-1B	LOC_Os01g45090
	Sspon.07G0015250-1A	LOC_Os05g49310
	Sspon.07G0015250-1T	LOC_Os01g03720
	Sspon.07G0015250-1P	LOC_Os12g37690
	Sspon.07G0015250-2P	LOC_Os07g48870
	Sspon.01G0002470-1A	LOC_Os03g20090
	Sspon.04G0008290-1P
	Sspon.04G0008290-4D
	Sspon.03G0010460-1A
	Sspon.03G0019490-1P
	Sspon.03G0019490-3C
	Sspon.03G0035610-2D
	Sspon.06G0031730-2D
	Sspon.02G0028760-4D
	Sspon.07G0014190-2P
	Sspon.07G0014190-1P
	Sspon.07G0014190-1A
	Sspon.07G0014090-1A
	Sspon.02G0000760-1A
	Sspon.01G0038440-3P
	Sspon.01G0038440-1B
	Sspon.01G0038440-1P
G9	Sspon.03G0030130-1B	LOC_Os01g59660
	Sspon.03G0030130-1P	LOC_Os03g38210
	Sspon.05G0016360-1A	LOC_Os06g40330
	Sspon.08G0003650-1A	LOC_Os05g41166
G10	Sspon.06G0032860-1D
	Sspon.05G0005850-1A
	Sspon.05G0031890-1C
G11	Sspon.06G0021460-1B	LOC_Os08g34960
	Sspon.03G0014130-1A	LOC_Os03g13310
	Sspon.07G0019860-1T	LOC_Os11g10130
	Sspon.07G0019860-1P	LOC_Os03g51110
	Sspon.07G0019860-1A	LOC_Os08g33800
	Sspon.01G0027410-1A	LOC_Os01g63160
	Sspon.01G0027300-2D	LOC_Os01g74590
	Sspon.06G0005900-1A	LOC_Os05g28320
	Sspon.03G0018460-1A	LOC_Os02g09480
	Sspon.03G0018470-2B	LOC_Os06g43090
	Sspon.03G0018470-1T
	Sspon.03G0018480-1A
	Sspon.03G0002620-1A
	Sspon.03G0007330-1A
	Sspon.03G0007330-1P
	Sspon.07G0010070-1A
	Sspon.07G0010070-1T
	Sspon.02G0018240-1A
	Sspon.04G0016420-1A
	Sspon.04G0016420-1P
	Sspon.04G0016420-1T
G12	Sspon.01G0037750-1B	LOC_Os07g14110
	Sspon.01G0037750-1T	LOC_Os07g12130
	Sspon.07G0019180-1A	LOC_Os01g63680
	Sspon.07G0006350-1A	LOC_Os12g07610
	Sspon.03G0002950-3D	LOC_Os06g06740
	Sspon.07G0025260-2C
	Sspon.03G0024750-2B
	Sspon.03G0024710-1P
G13	Sspon.02G0044740-1B
G14	Sspon.01G0008780-3D	LOC_Os07g25370
	Sspon.02G0042630-1B	LOC_Os02g49250
	Sspon.02G0003090-2B	LOC_Os12g41920
	Sspon.02G0033760-1B	LOC_Os01g51154
	Sspon.04G0012800-1A	LOC_Os01g40670
	Sspon.01G0024880-1A	LOC_Os07g43420
	Sspon.01G0024880-1P	LOC_Os02g17190
	Sspon.05G0000880-1A	LOC_Os04g41830
	Sspon.05G0000880-1P	LOC_Os05g03550
	Sspon.03G0020280-1A	LOC_Os01g04930
	Sspon.03G0002490-1P	LOC_Os01g63460
	Sspon.03G0002490-3C	LOC_Os05g37730
	Sspon.07G0006770-1A
	Sspon.03G0002490-2P
G15	Sspon.02G0027270-1A
	Sspon.03G0000150-1A
	Sspon.03G0027840-1B
	Sspon.02G0027270-1P
	Sspon.02G0027270-2P
